# Supplementary material for: Activated carbon from butia endocarp hydrochar obtained via hydrothermal liquefaction as an adsorbent for the removal of Paracetamol and 2,4-Dichlorophenoxyacetic Acid
Source: Research Square preprint supplement (doi:10.21203/rs.3.rs-7829945/v1), 2025-11-13
Supplement: Supplementary file 1 [file 8ecab8dda2d0117bd673770b.docx]

**SUPPLEMENTARY MATERIAL**

*Characterization techniques*

The hydrochar and the activated carbon were characterized using several analytical techniques to determine their morphological, structural, chemical, and thermal properties. Fourier Transform Infrared Spectroscopy (FT-IR) with a Shimadzu spectrophotometer, model IR Prestige 21, employing the KBr pellet method and a reading range of 4500-450 cm-1, for the identification of surface functional groups; The crystallinity of the material was analyzed via XRD in a Rigaku diffractometer type model, Miniflex 300 model, under the conditions of radiation analysis Cu Kα (λ = 1.54051 Å) and power source with 30 kV and 10 mA, with a step size of 0.03° and a count time of 0.5 s per Step; by Scanning electron microscopy coupled with energy-dispersive X-ray spectroscopy (SEM-EDS) (Tescan, Mira 3, Czech Republic), for morphology and surface elemental composition; The adsorbent's thermal stability was evaluated using TGA, under the ramp rate conditions of 5 and 10 °C min-1, under nitrogen atmosphere at a flow rate of 50 and 100 mL min-1, to assess thermal stability and mass loss associated with the release of volatile compounds and thermal degradation. Additionally, the activated carbon was further characterized by determining its point of zero charge (pHpzc). For this analysis, 0.02 g of material was added to 20 mL of a 0.1 mol L⁻¹ NaCl solution with different initial pH values (1–12). The suspensions were agitated at 100 rpm and 25 °C for 24 h, after which they were filtered, and the final pH was measured. The pHpzc corresponds to the range in which the final pH remains constant. Adsorption/desorption isotherms of N2 were used to determine the specific surface area and pore size distribution, applying the Brunauer-Emmett-Teller (BET) and Barret-Joyner-Halenda (BJH) methods, respectively. A porosimeter analyzer from Micrometrics (model ASAP 2020, USA) was used to quantify these textural parameters at 77 K. These analyses allowed the quantification of surface area, pore size, and pore volume, which are essential parameters for correlating the porous structure of the material with its adsorption efficiency.
